# Supplementary material for: High-fat diet enhances stemness and tumorigenicity of intestinal progenitors
Source: Springer Nature journal article supplement (doi:10.1038/nature17173), 2016-03-01
Supplement: 41586_2016_BFnature17173_MOESM310_ESM.pdf [file 41586_2016_BFnature17173_MOESM310_ESM.pdf]

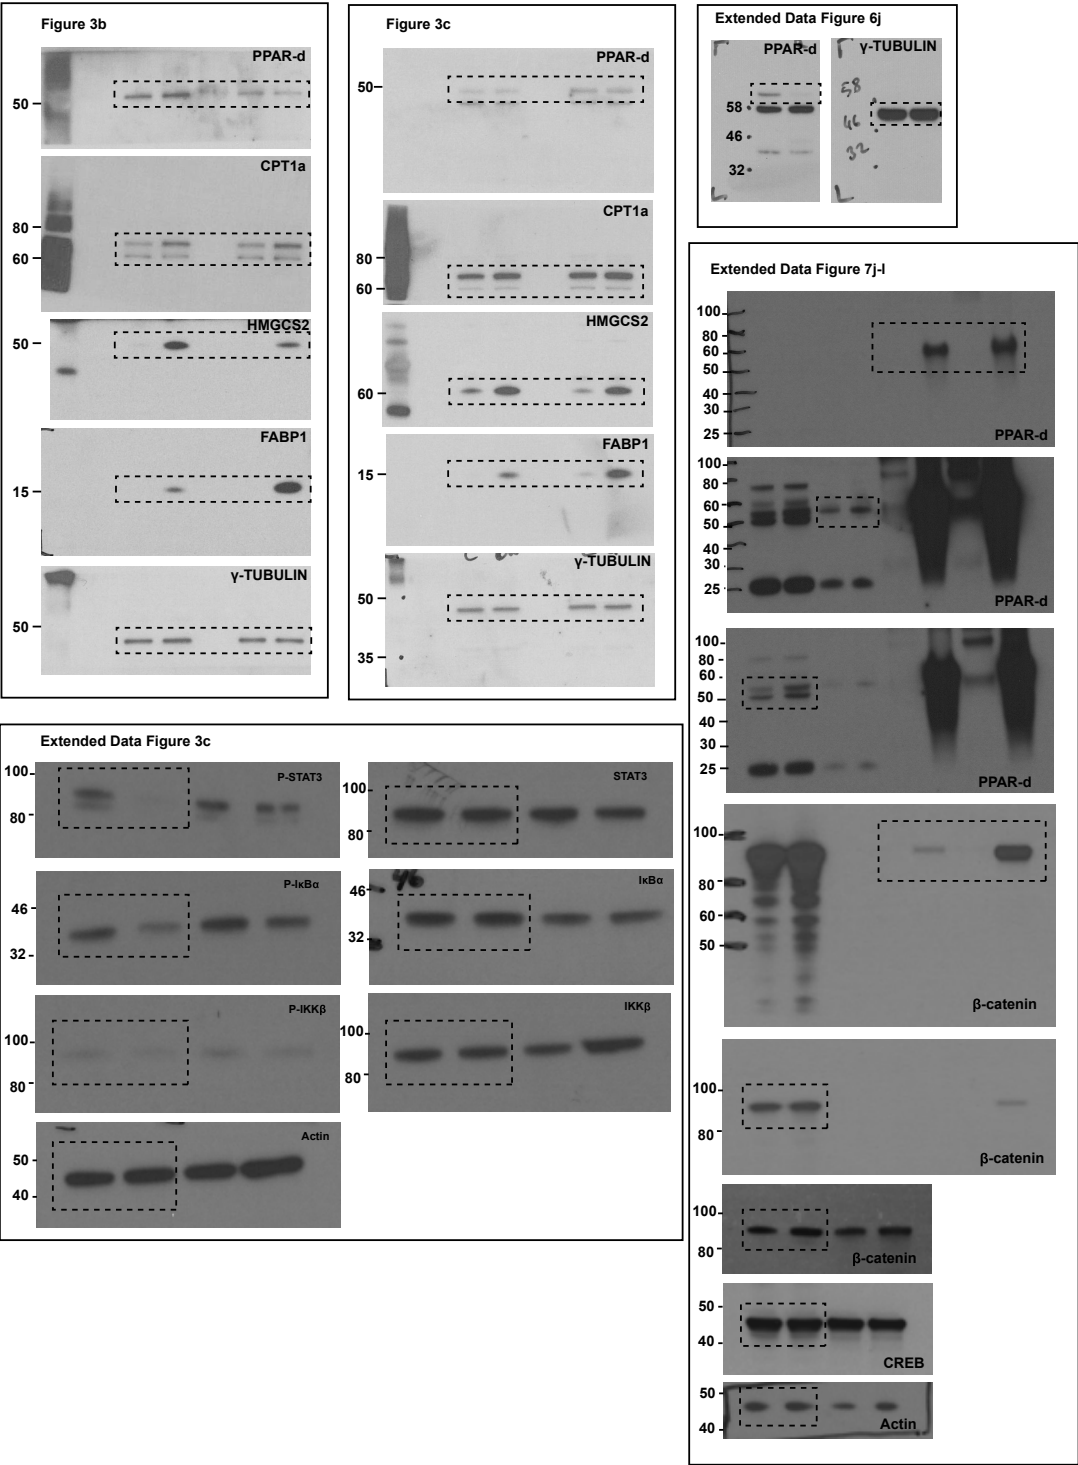

**Supplementary Figure 1.** Original blots from figures. Dashed box indicates cropped images shown in the corresponding figures.

## HFD increases ISC proliferation

The fact that HFD boosted the numbers of ISCs and crypt depth in the small intestine suggested that it augments the proliferation of ISCs and their more differentiated progeny (i.e. progenitors), which reside in intestinal crypts. To address this possibility, we assessed incorporation of 5-bromodeoxyuridine (BrdU) into ISCs and progenitors. After a 4-hour pulse of BrdU, crypts of HFD mice had more BrdU<sup>+</sup> stem cells compared to controls (Fig. 1b, Extended Data 1h, i; and for the colon, Extended Data 3f). Furthermore, HFD augmented the number of BrdU<sup>+</sup> cells in the larger pool of progenitors (Fig. 1b, Extended Data 1i), indicating that output and migration from this compartment into villi may also increase. Indeed, HFD mice 24 hour after a single dose of BrdU had more absolute numbers of BrdU-labeled cells in the villi (Extended Data 1j, k) and a greater percentage of villus enterocytes that were BrdU<sup>+</sup> (Extended Data 1j, k). These findings demonstrate that the increase in stem and progenitor cell proliferation induced by HFD translates into enhanced output and migration of crypt cells into the villus.

## A HFD and PPAR- $\delta$ signaling increase $\beta$ -catenin activity

Single cell analyses of  $\beta$ -catenin target gene expression revealed heterogeneity in control and HFD-derived ISCs and progenitors (Extended Data 8a). t-Distributed stochastic neighbor embedding (t-SNE) analysis of single cell gene expression data of all  $\beta$ -catenin target genes demonstrated clustering of HFD-derived ISCs and progenitors (Extended Data 8d) from their control-fed counterparts, consistent with the notion that HFD induces  $\beta$ -catenin target gene expression in intestinal stem and progenitor cells. Furthermore, we found that while HFD-induced  $\beta$ -catenin signature genes (HFD signature; Extended Data 8c) were heterogeneously

expressed in control ISCs and progenitors, they formed a distinct cluster upon HFD as shown in the t-SNE analysis (Extended Data 8f) and by qRT-PCR in the colon (Extended Data 3i).

### **Analysis of leptin receptor deficient *db/db* obese mice**

In contrast to controls, small intestinal mass, length, and villi length increased, while crypt depth, ISC and Paneth cell numbers decreased in *db/db* mice (Extended Data 9a-h). Although organoid-forming capacity of *db/db* crypts trended higher relative to controls (Extended Data 9i), there was no increase in HFD-induced PPAR-d or  $\beta$ -catenin target gene expression in *db/db* intestinal progenitors (Extended Data 9j). Overall, these findings are mostly opposite to what we observed in HFD mice and highlight that, even in obesity, diet impacts intestinal stem and progenitor biology.

### **Enforced PPAR-d signaling permits non-*Lgr5*<sup>+</sup> cells to initiate intestinal adenomas**

The finding that *Apc-loss* after enforced PPAR-d signaling does not have additive effects on tumor initiation indicates that in *Apc-wild type* stem cells enforced PPAR-d signaling drives many of its effects (e.g. reduced Paneth cell dependence in the assay) through beta-catenin signaling (Fig. 5g, h). In the *Apc-null* state, it is interesting to note that enforced PPAR-d signaling differentially affects the adenoma-initiating capacity of stem and progenitor cells upon *Apc* loss (Fig. 5g, h). One possible explanation for this divergence may be that ISCs, in contrast to progenitors, are in a cellular state that is facilitative for  $\beta$ -catenin signaling. Progenitors, however, are in a more differentiated cellular state that is less responsive to  $\beta$ -

catenin signaling, and perhaps enforced PPAR-d signaling in a subset of progenitors augments this responsiveness—thus enabling them to initiate tumors upon *Apc-loss*.

### Supplementary Table 1 | Primer sequences for qRT-PCR

| Gene              | Forward Primer           | Gene              | Reverse Primer          |
|-------------------|--------------------------|-------------------|-------------------------|
| Pparg_F           | CCACCAACTTCGGAATCAGCT    | Pparg_R           | TTTGTGGATCCGGCAGTTAAGA  |
| Ppara_F           | AGAGCCCCATCTGTCTCTC      | Ppara_R           | ACTGGTAGTCTGCAAAACCAAA  |
| Ppard_F           | TCCATCGTCAACAAAGACGGG    | Ppard_R           | ACTTGGGCTCAATGATGTCAC   |
| Mgll_F            | CGGACTTCCAAGTTTTTGTGAGA  | Mgll_R            | GCAGCCACTAGGATGGAGATG   |
| Slc22a3_F         | CGTTTTCTGCTCTTTCCGGCTG   | Slc22a3_R         | TGCAACTGTGAAGTCCCAAG    |
| Fabp1_F           | GGGAAGAAAATCAAACCTACCATC | Fabp1_R           | AGTTGTACCATTTTATTGTACC  |
| Pdk4_F            | AGGGAGGTCGAGCTGTTCTC     | Pdk4_R            | GGAGTGTTCACTAAGCGGTCA   |
| Hmgcs2_F          | ATACCACCAACGCCTGTTATGG   | Hmgcs2_R          | CAATGTACCACAGACCACCAG   |
| Cpt1a_F           | CCATGAAGCCCTCAAACAGATC   | Cpt1a_R           | ATCACACCCACCACCACGATA   |
| Actb_F            | GGCTGTATTCCCCTCCATCG     | Actb_R            | CCAGTTGGTAACGCCATGT     |
| mtCytB_F          | CATTTATTATCGCGGCCCTA     | mtCytB_R          | TGTTGGGTTGTTTGTATCCTG   |
| bglobin_F         | GAAGCGATTCTAGGGAGCAG     | bglobin_R         | GGAGCAGCGATTCTGAGTAGA   |
| Il6_F             | TAGTCCTTCTACCCCAATTTCC   | Il6_R             | TTGGTCTTAGCCACTCCTTC    |
| Il1b_F            | GCAACTGTTCTGAACTCAACT    | Il1b_R            | ATCTTTTGGGGTCCGTCAACT   |
| Tnfa_F            | CCCTCACACTCAGATCATCTTCT  | Tnfa_R            | GCTACGACGTGGGCTACAG     |
| Ifng_F            | ATGAACGCTACACACTGCATC    | Ifng_R            | CCATCCTTTTGCAGTTCTCT    |
| Apc-Int13Flox_F   | GAGAAACCCTGTCTCGAAAAAA   | Apc-Int13Flox_R   | AGTGCTGTTTCTATGAGTCAAC  |
| Apc-Int13F2_del_F | GAGAAACCCTGTCTCGAAAAAA   | Apc-Int14R4_del_R | TTGGCAGACTGTGTATATAAGC  |
| qCD24a_F          | TTCTGGCACTGCTCCTACC      | qCD24a_R          | GCGTTACTTGGATTTGGGGAA   |
| qChga_Fwd         | CCAAGGTGATGAAGTGCGTC     | qChga_Rev         | GGTGTCGCAGGATAGAGAGGA   |
| Ppard_del_F       | TGTGCAGACCTCTCCAGAA      | Ppard_del_R       | CCGACATTCCATGTTGAGGC    |
| Lyz_F             | GAGACCGAAGCACCGACTATG    | Lyz_R             | CGGTTTTGACATTGTGTTCCG   |
| Muc2_F            | ATGCCACCTCCTCAAAGAC      | Muc2_R            | GTAGTTTCCGTTGGAACAGTGAA |
| human_Cpt1a_F     | TCCAGTTGGCTTATCGTGGTG    | human_Cpt1a_R     | TCCAGAGTCCGATTGATTTTTGC |
| human_Pdk4_F      | GGAGCATTCTCGCGCTACA      | human_Pdk4_R      | ACAGGCAATTCTTGTCCGAAA   |
| human_Hmgcs2_F    | GACTCCAGTGAAGCGCATTCT    | human_Hmgcs2_F    | CTGGGAAGTAGACCTCCAGG    |
| human_Fabp1_F     | GTGTGGAAAATCGTGCAGAAT    | human_Fabp1_F     | GACTTTCTCCCCTGTCATTGTC  |

### Supplementary Table 2 | Primer sequences for single cell analysis

| SEQUENCE NAME | Forward Primer         | SEQUENCE NAME | Reverse Primer          |
|---------------|------------------------|---------------|-------------------------|
| ABCB1F        | CAGCAGTCAGTGTGCTTACAA  | ABCB1R        | ATGGCTCTTTTATCGGCCTCA   |
| ADAM10F       | ATGGTGTGGCCGACAGTGTTA  | ADAM10R       | GTTTGGCAGCGTGGTGTTTTT   |
| ALEX1F        | CTGGTGCCTGCTACTGTGTAT  | ALEX1R        | CCCCTACCCCAACATTAGTCT   |
| ASCL2F        | AAGCACACCTTGACTGGTACG  | ASCL2R        | AAGTGGACGTTTGCACCTTCA   |
| AXIN2F        | TGACTCTCCTTCCAGATCCCA  | AXIN2R        | TGCCCACACTAGGCTGACA     |
| BAMBIF        | GATCGCCACTCCAGCTACTTC  | BAMBIR        | GCAGGCACTAAGCTCAGACTT   |
| BCL2L2F       | GCGGAGTTCACAGCTCTATAC  | BCL2L2R       | AAAAGGCCCTACAGTTACCA    |
| BCL2L1F       | GACAAGGAGATGCAGGTATTGG | BCL2L1R       | TCCCGTAGAGATCCACAAAAGT  |
| BIRC5F        | GAGGCTGGCTTCATCCACTG   | BIRC5R        | CTTTTTGCTTGTTGTTGGTCTCC |
| BMI1F         | ATCCCCACTTAATGTGTGTCCT | BMI1R         | CTTGCTGGTCTCCAAGTAACG   |
| BMP4F         | TTCCTGGTAACCGAATGCTGA  | BMP4R         | CCTGAATCTCGGCGACTTTTT   |
| CCND1F        | GCGTACCCTGACACCAATCTC  | CCND1R        | CTCCTTCTCGCACTTCTGCTC   |
| CD44F         | CACCATTGCCTCAACTGTGC   | CD44R         | TTGTGGGCTCCTGAGTCTGA    |
| CDKN2AF       | CGCAGGTTCTTGGTCACTGT   | CDKN2AR       | TGTTACGAAAGCCAGAGCG     |
| CDX1F         | GGACGCCCTACGAATGGATG   | CDX1R         | GTACCGGCTGTAGTGAAACTC   |

|         |                          |         |                          |
|---------|--------------------------|---------|--------------------------|
| CLDN1F  | GGGGACAACATCGTGACCG      | CLDN1R  | AGGAGTCGAAGACTTTGCACT    |
| COX2F   | TGAGCAACTATTCCAAACCAGC   | COX2R   | GCACGTAGTCTTCGATCACTATC  |
| DKK1F   | CTCATCAATTCCAACGCGATCA   | DKK1R   | GCCCTCATAGAGAACTCCCG     |
| DKK4F   | GTA CTGGTGACCTTGCTTGGA   | DKK4R   | CCGTTCCATCGTGAAACGCTAAG  |
| DNMT1F  | AAGAATGGTGTGTCTACCGAC    | DNMT1R  | CATCCAGTTGCTCCCCTTG      |
| EDN1F   | GCACCGGAGCTGAGAATGG      | EDN1R   | GTGGCAGAAGTAGACACACTC    |
| EFNB1F  | TGTGGCTATGGTCGTGCTG      | EFNB1R  | CCAAGCCCTTCCCCTTAGG      |
| ENC1F   | CTGTTTCATAAGTCCTCCTACGC  | ENC1R   | CACCACTGAACATGGCTTCG     |
| EPHB2F  | GCGGCTACGACGAGAACAT      | EPHB2R  | GGCTAAGTCAAATCAGCCTCA    |
| EPHB3F  | CATGGACACGAAATGGGTGAC    | EPHB3R  | GCGGATAGGATTCATGGCTTCA   |
| FGF18F  | CCTGCACCTGCCTGTGTTTAC    | FGF18R  | TGCTTCCGACTCACATCATCT    |
| FGFBP1F | CTAAATCTCTGACGCATGGCA    | FGFBP1R | AACTCCTGATCGGCTTGTTGTG   |
| FGFBP3F | GGTCGCTTCGTGAGTCCAG      | FGFBP3R | AGCAGCCGTCTCCAGTAGT      |
| FRA1F   | ATGTACCGAGACTACGGGGAA    | FRA1R   | CTGCTGCTGTGATGCTTG       |
| FSCN1F  | GACTGCGAAGGTCGCTACC      | FSCN1R  | CTGATCGGTCTTTCATCCTGA    |
| GASTF   | CGCTCCCAGCTACAGGATG      | GASTR   | GGTCTGCTATGAAGTGTGAGG    |
| HATH1F  | GAGTGGGCTGAGGTAAAAGAGT   | HATH1R  | GGTCGGTGCTATCCAGGAG      |
| NEDD9F  | ATGTGGGCGAGGAATCTTATGG   | NEDD9R  | TTCCCTGGGACAATGCCTTG     |
| HES1F   | CCAGCCAGTGTCAACACGA      | HES1R   | AATGCCGGGAGCTATCTTTCT    |
| ID2F    | ATGAAAGCCTTCAGTCCGGTG    | ID2R    | AGCAGACTCATCGGGTCGT      |
| TCF4F   | CGAAAAGTTCCTCCGGGTTTG    | TCF4R   | CGTAGCCGGGCTGATTCAT      |
| JAG1F   | CCTCGGGTCAGTTTGAGCTG     | JAG1R   | CCTTGAGGCACACTTTGAAGTA   |
| JUNF    | CCTTCTACGACGATGCCCTC     | JUNR    | GGTTCAAGGTCATGCTCTGTTT   |
| L1CAMF  | AAAGGTGCAAGGGTGACATTC    | L1CAMR  | TCCCCACGTTCTGTAGGT       |
| LAMC2F  | CAGACACGGGAGATTGCTACT    | LAMC2R  | CCACGTTCCCCAAAGGGAT      |
| LEF1F   | TGTTTATCCCATCACGGGTGG    | LEF1R   | CATGGAAGTGTGCGCTGACAG    |
| LGR5F   | CCTACTCGAAGACTTACCCAGT   | LGR5R   | GCATTGGGGTGAATGATAGCA    |
| MENAF   | GCCCAGAGCAAGGTTACTG      | MENAR   | GCCCACAGAAAATACATCGCAA   |
| METF    | GTGAACATGAAGTATCAGCTCCC  | METR    | TGTAGTTTGTGGCTCCGAGAT    |
| MMP14F  | CAGTATGGCTACCTACCTCCAG   | MMP14R  | GCCTTGCCTGTCACTTGTAAG    |
| MMP7F   | CTGCCACTGTCCCAGGAAG      | MMP7R   | GGGAGAGTTTTCCAGTCATGG    |
| MYBF    | AGACCCCGACACAGCATCTA     | MYBR    | CAGCAGCCCATCGTAGTCAT     |
| MYCF    | ATGCCCTCAACGTGAACTTC     | MYCR    | CGCAACATAGGATGGAGAGCA    |
| MYCBPF  | GCTGGACACGCTGACGAAA      | MYCBPR  | TCTAGGCGAAGCAGCTCTATTT   |
| NOS2F   | GTTCTCAGCCCAACAATAACAAGA | NOS2R   | GTGGACGGGTGATGTAC        |
| NOTCH2F | ATGTGGACGAGTGTCTGTTGC    | NOTCH2R | GGAAGCATAGGCACAGTCATC    |
| NRCAMF  | AAAGGGAAACCTCCCCAAG      | NRCAMR  | TGTTGATGACAAGGGTTCCTGA   |
| PLAUF   | GCGCCTTGGTGGTGA AAAAC    | PLAUR   | TTGTAGGACACGCATACACCT    |
| PLAURF  | CAGAGCTTTCCACCGAATGG     | PLAURR  | GTCCCCGGCAGTTGATGAG      |
| PPARDF  | TCCATCGTCAACAAAGACGGG    | PPARDR  | ACTTGGGCTCAATGATGTCAC    |
| S100A4F | TCCACAAATACTCAGGCAAAGAG  | S100A4R | GCAGCTCCCTGGTCAGTAG      |
| SGK1F   | CTGCTCGAAGCACCCCTTACC    | SGK1R   | TCCTGAGGATGGGACATTTTCA   |
| SMC3F   | CGAAGTTACCGAGACCAAACA    | SMC3R   | TCACTGAGAACA AACTGGATTGC |

|            |                         |            |                         |
|------------|-------------------------|------------|-------------------------|
| SOX9F      | AGTACCCGCATCTGCACAAC    | SOX9R      | ACGAAGGGTCTCTTCTCGCT    |
| SP5F       | TGGGTTCCACCTCCAGACTTT   | SP5R       | CCGGCGAGAAGCTCGTAAGG    |
| SRSF3F     | GCGCAGATCCCCAAGAAGG     | SRSF3R     | ATCGGCTACGAGACCTAGAGA   |
| SUZ12F     | AACTCGAAATCTTATCGCACCAA | SUZ12R     | TGCAAATGTGCAGACAAGCTAT  |
| TCF1F      | AGGAGTGTAAATAGGGCGGAGT  | TCF1R      | GAGGTCCGTTATAGGTGTCCA   |
| TIAM1F     | GAAGCACACTTCACGCTCC     | TIAM1R     | CTCCAGGCCATTTTCAGCCA    |
| TNCF       | ACGGCTACCACAGAAGCTG     | TNCR       | ATGGCTGTTGTTGCTATGGCA   |
| VEGFF      | GCCAGACAGGGTTGCCATAC    | VEGFR      | GGAGTGGGATGGATGATGTACG  |
| YAP1F      | TACTGATGCAGGTAAGTGC     | YAP1R      | TCAGGGATCTCAAAGGAGGAC   |
| CCND3F     | CGAGCCTCCTACTTCCAGTG    | CCND3R     | GGACAGGTAGCGATCCAGGT    |
| FZD1F      | CAGCAGTACAACGGCGAAC     | FZD1R      | GTCCTCCTGATTCGTGTGGC    |
| FZ7F       | GCCACACGAACCAAGAGGAC    | FZ7R       | CGGGTGCGTACATAGAGCATAA  |
| BTRCPF     | AAGACTGTAATAATGGCGAACCC | BTRCPR     | TCTCTTGGTTTATGCAAAGCCTG |
| BCATENINF  | ATGGAGCCGGACAGAAAAGC    | BCATENINR  | CTTGCCACTCAGGGAAGGA     |
| NEMOF      | AAGCACCCCTGGAAGAACC     | NEMOR      | CCTGCTCTGAAGGCAGATGTA   |
| NAKED1F    | AGGAAAAGGCATCGAGGAGTG   | NAKED1R    | TCGCTCAGTCTCTCCATTCTC   |
| RNF43F     | TCCGAAAGATCAGCAGAACAGA  | RNF43R     | GGACTGCATTAGCTTCCCTTC   |
| LRP6F      | TTGTTGCTTTATGCAAACAGACG | LRP6R      | GTTTCGTTAATGGCTTCTTCGC  |
| LRP5F      | AAGGGTGTGTGTACTGGAC     | LRP5R      | AGAAGAGAACCTTACGGGACG   |
| OLFM4F     | CAGCCACTTTCCAATTTCACTG  | OLFM4R     | GCTGGACATACTCCTTCACCTTA |
| PREX1F     | TTTAACCAGGTCGATTCCATCCA | PREX1R     | CGGACCGTGCATTCTCTTT     |
| RAC1F      | GAGACGGAGCTGTTGGTAAAA   | RAC1R      | ATAGGCCCCAGATTCACTGGTT  |
| Cldn15F    | ATGTCGGTAGCTGTGGAGAC    | Cldn15R    | GGACGGAAAGTCCCAGCAG     |
| Edn3F      | CCCTGGTGAGAGGATTGTGTC   | Edn3R      | CCTTGTCTTGTAAAGTGAAGCAC |
| EFNB2F     | ATTATTTGCCCCAAAGTGGACTC | EFNB2R     | GCAGCGGGGTATTCTCCTTC    |
| EPHB4F     | TATGCCACGATACGCTTCACC   | EPHB4R     | AGCTTCGCTCTCGTAATAGAAGA |
| FGFR4F     | GCTCGGAGGTAGAGGTCTTGT   | FGFR4R     | CCACGCTGACTGGTAGGAA     |
| NEDD8F     | GGAGCGAATCAAGGAGCGT     | NEDD8R     | ACGGAACCACCTAGAATCTTGT  |
| TCF7F      | AGCTTTCTCCACTCTACGAACA  | TCF7R      | AATCCAGAGAGATCGGGGGTC   |
| JAG2F      | CAATGACACCACTCCAGATGAG  | JAG2R      | GGCCAAAGAAGTCGTTGCG     |
| SMC2F      | GGCTGGGATTACCAAAGCCTC   | SMC2R      | CACCAATAACCACCTGTCTTGT  |
| Sox9F      | GAGCCGGATCTGAAGAGGGA    | Sox9R      | GCTTGACGTGTGGCTTGTTC    |
| NcadherinF | ATGTGCCGGATAGCGGGAGC    | NcadherinR | TACACCGTGCCGTCCTCGTC    |
| EcadherinF | CACCTGGAGAGAGGCCATGT    | EcadherinR | TGGGAAACATGAGCAGCTCT    |
| ACTINBF    | GGCTGTATTCCCCTCCATCG    | ACTINBR    | CCAGTTGGTAACAATGCCATGT  |
| GAPDHF     | AGGTCGGTGTGAACGGATTTG   | GAPDHR     | TGTAGACCATGTAGTTGAGGTCA |
